# Supplementary material for: Bimetallic silver nanoparticle–gold nanocluster embedded composite nanoparticles for cancer theranostics
Source: Royal Society of Chemistry journal article supplement (doi:10.1039/c5tb01583a), 2015-12-18
Supplement: c5tb01583a1.pdf [file c5tb01583a1.pdf]

## Electronic Supplementary Information

### Bimetallic Silver nanoparticle-Gold nanocluster embedded composite for cancer theranostics

Deepanjalee Dutta,<sup>a</sup> Amaresh Kumar Sahoo,<sup>a</sup> Arun Chattopadhyay <sup>a,c\*</sup> and Siddhartha Sankar Ghosh <sup>a,b\*</sup>

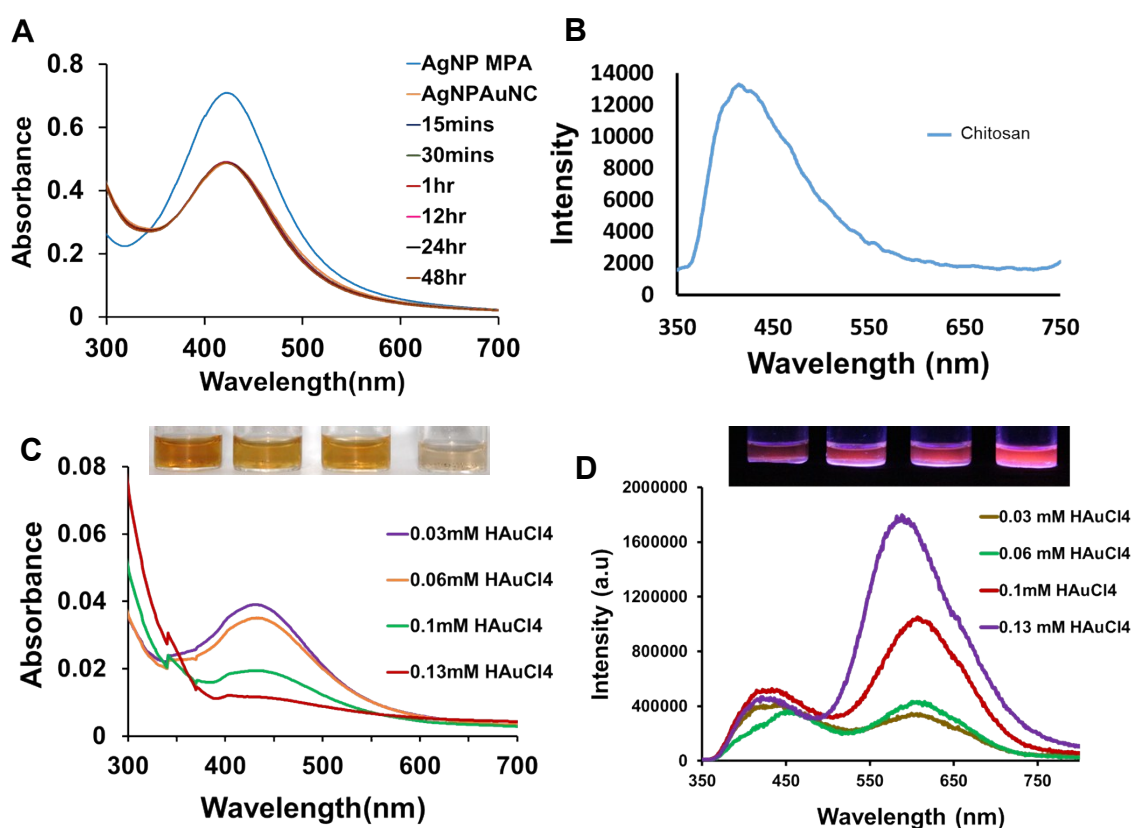

**Figure S1.** (A) Time dependent UV – Vis absorption spectra of the AgNP-AuNCs, (B) Emission spectra of control chitosan. ( $\lambda_{\text{ex}} = 300 \text{ nm}$ ), (C) UV-Vis absorption spectra of the AgNP-AuNCs with increasing concentration of HAuCl<sub>4</sub>, corresponding images are given in the inset, (D) Emission spectra of the AgNP-AuNCs with increasing concentration of HAuCl<sub>4</sub>, corresponding images are given in the inset. ( $\lambda_{\text{ex}} = 300 \text{ nm}$ ).

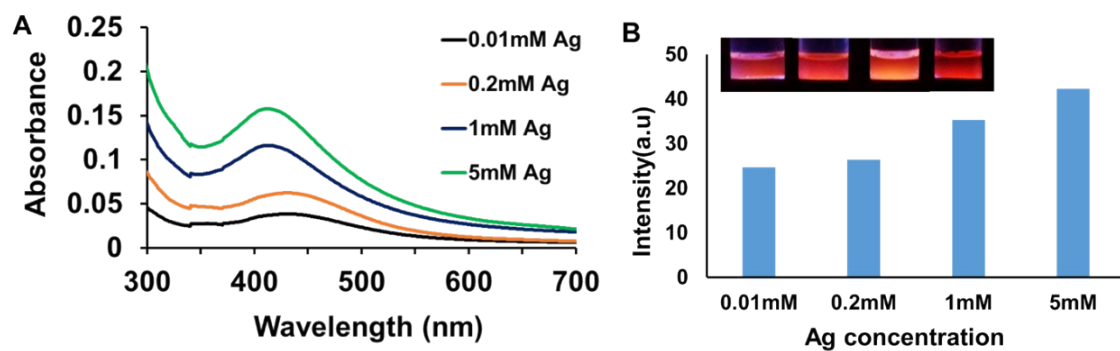

**Figure S2.** (A) UV-Vis absorption spectra of the AgNP-AuNCs with increasing amount of Ag. (B) Emission intensity of the AgNP-AuNCs with increasing concentration of Ag, corresponding images are given in the inset.

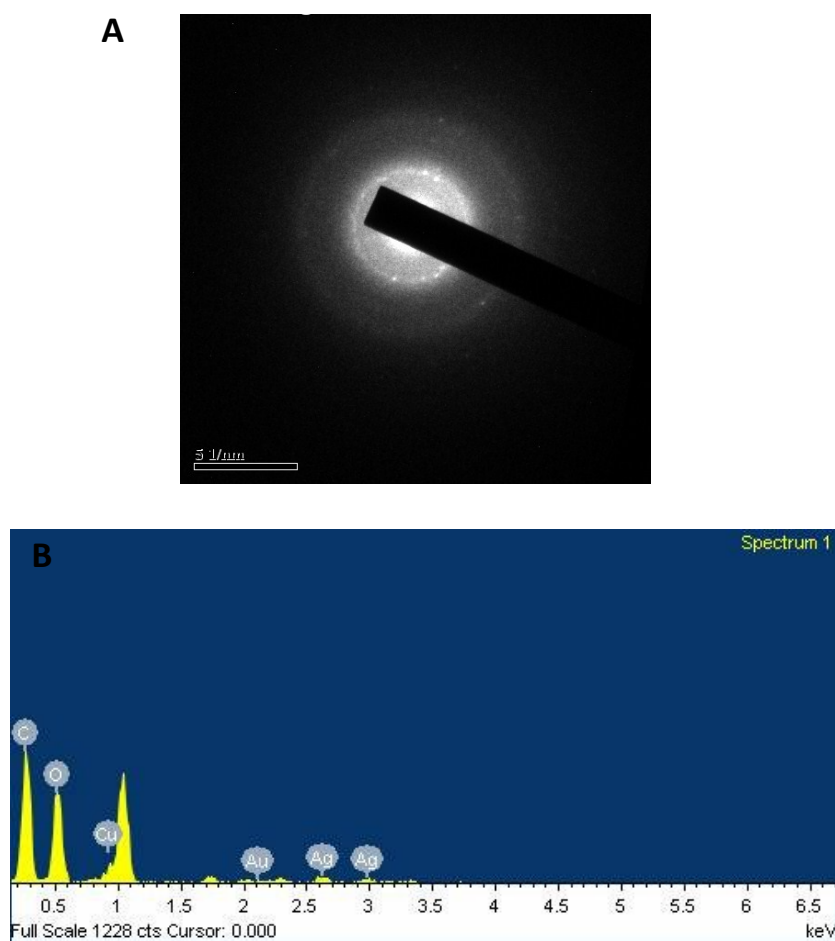

**Figure S3.**(A) SAED of AgNP-AuNCs, (B) EDX spectrum of the AgNP-AuNCs.

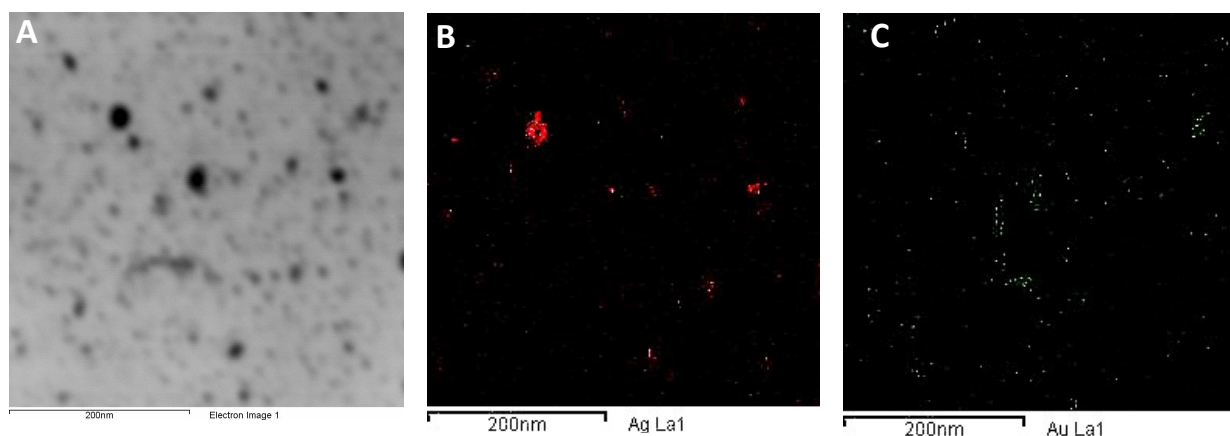

**Figure S4.** HAADF-STEM (BF) image of AgNP-AuNCs synthesized in chitosan matrix (A); EDX mapping image corresponding to Ag (B) and EDX mapping image corresponding to Au(C)

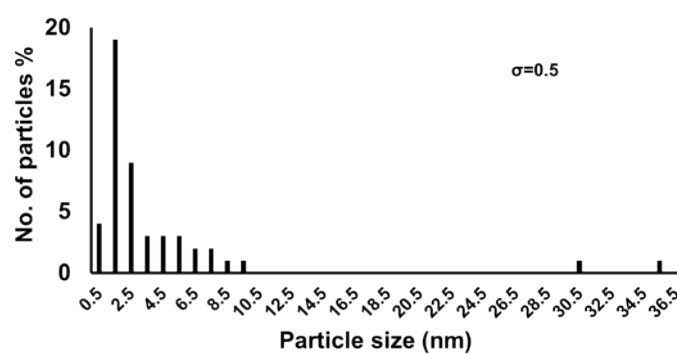

**Figure S5.** Particle size distribution of the AgNP-AuNCs as obtained from the TEM image in Figure 1(C).

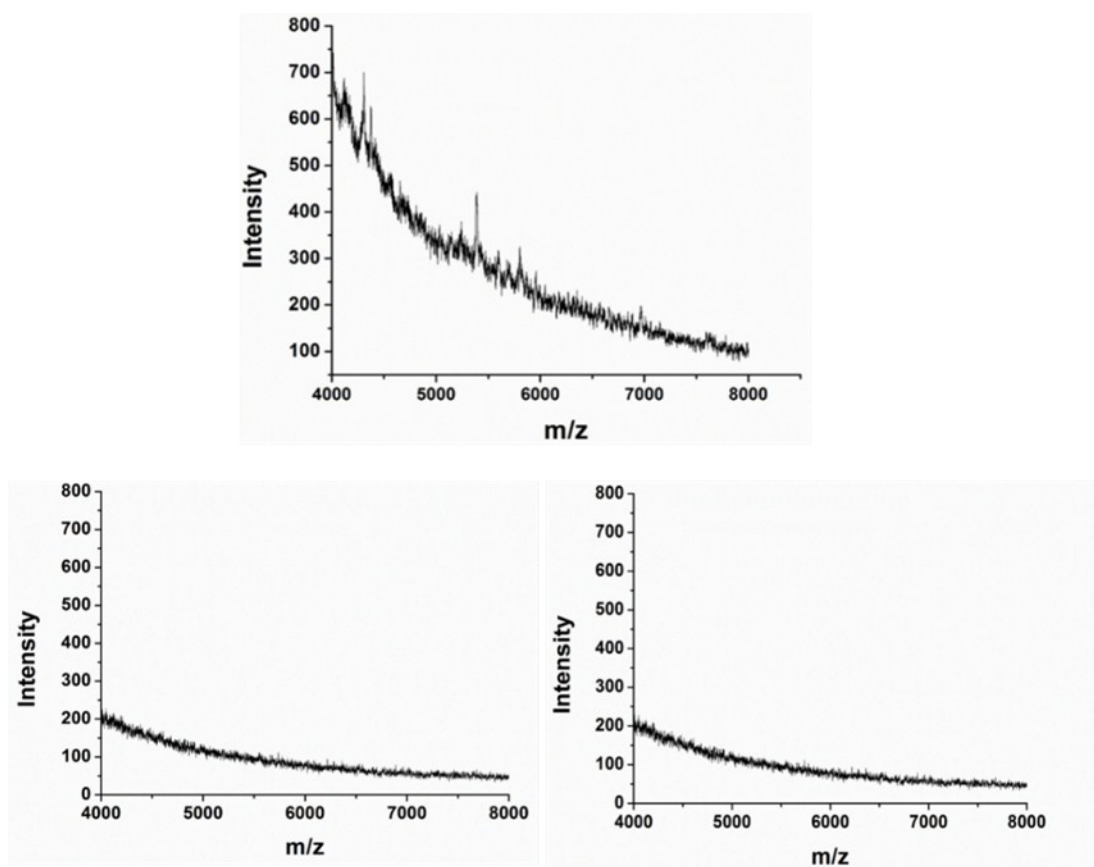

**FigureS6:** MALDI-TOF analysis of (A) AgNP-AuNCs, (B) control AgNPs and (C) control chitosan.

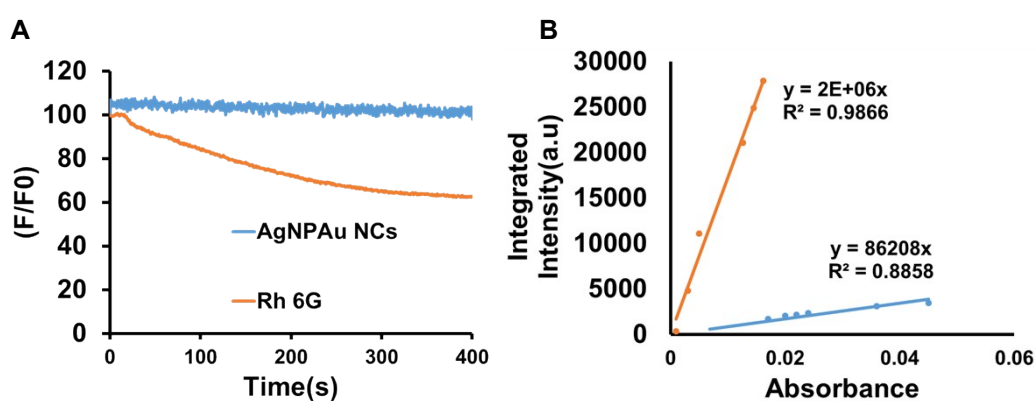

**Figure S7.** (A) Photostability of AgNP-AuNCs with respect to rhodamine 6G. (B) Quantum yield of AgNP-AuNCs with respect to quinine sulphate.

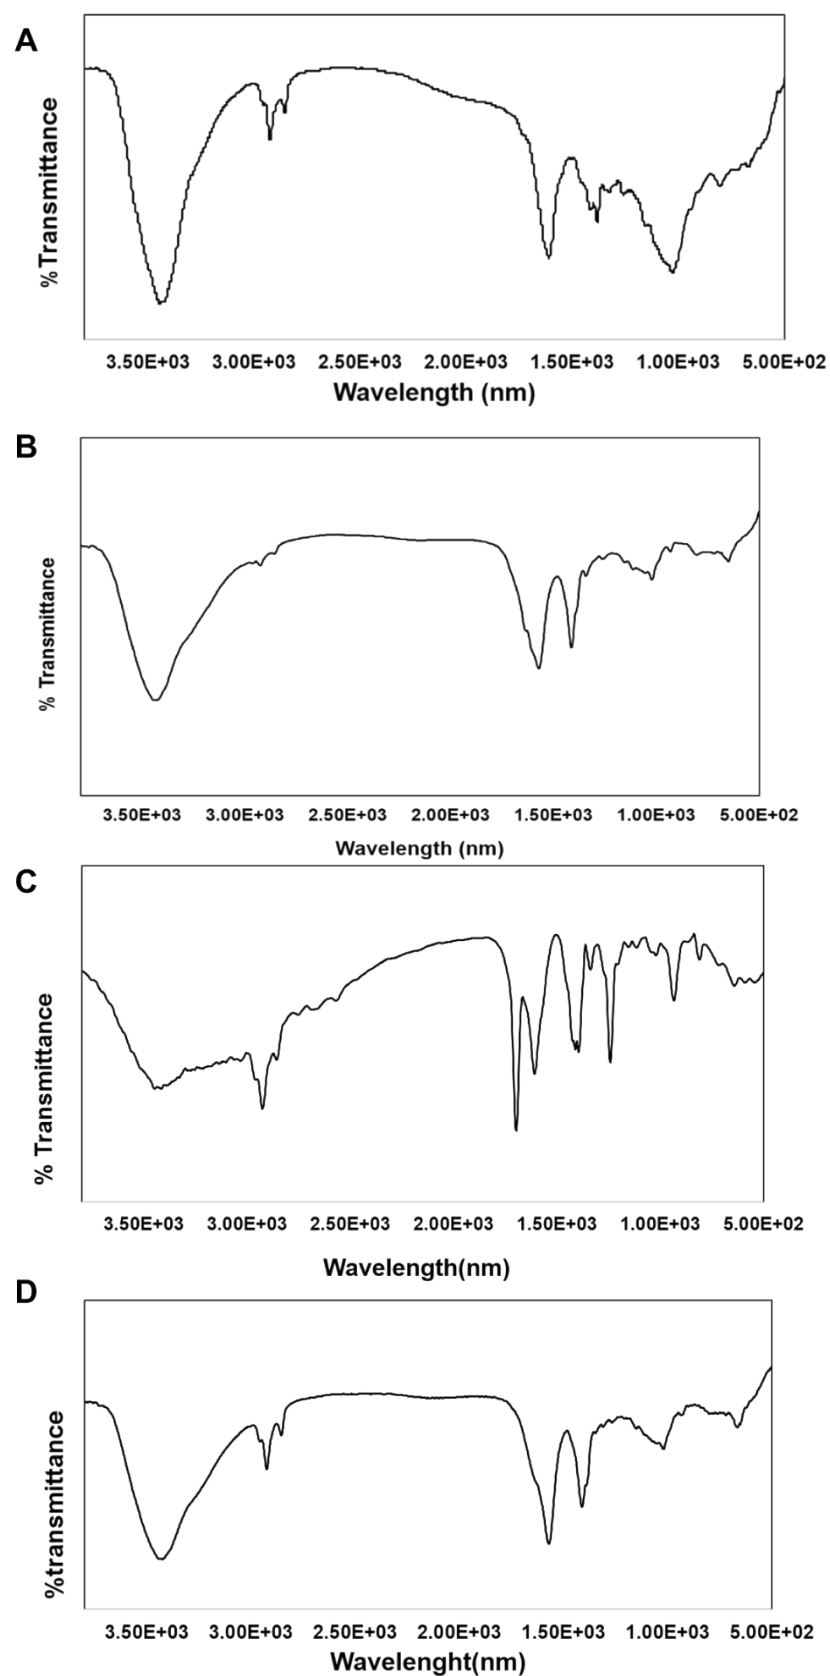

**Figure S8.** (A) FTIR spectrum of control chitosan (B) FTIR spectrum of AgNPs (chitosan

stabilized), (C) FTIR spectrum of free MPA, (D) FTIR spectrum of AgNP-AuNCs (chitosan stabilized).

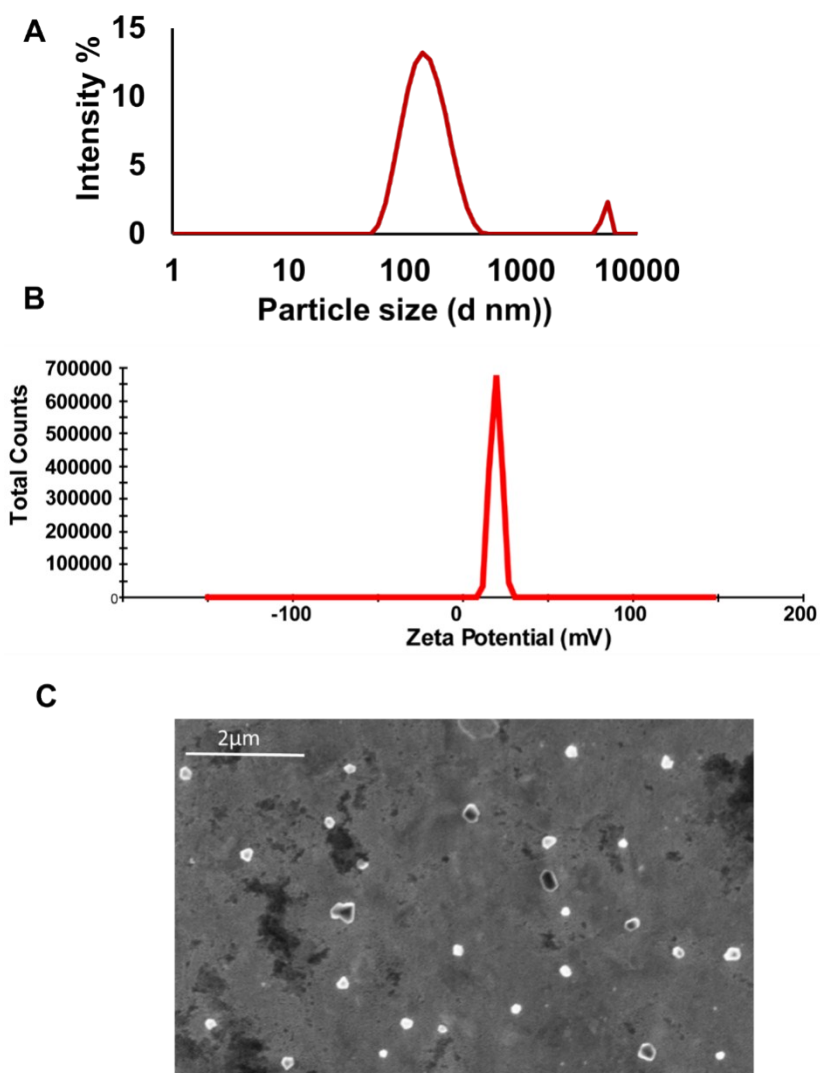

**Figure S9.** (A) Hydrodynamic particle size of composite NPs (AgNP-AuNC-CS NP). (B) Zeta potential distribution of composite NPs. (C) FESEM image of the composite NPs.

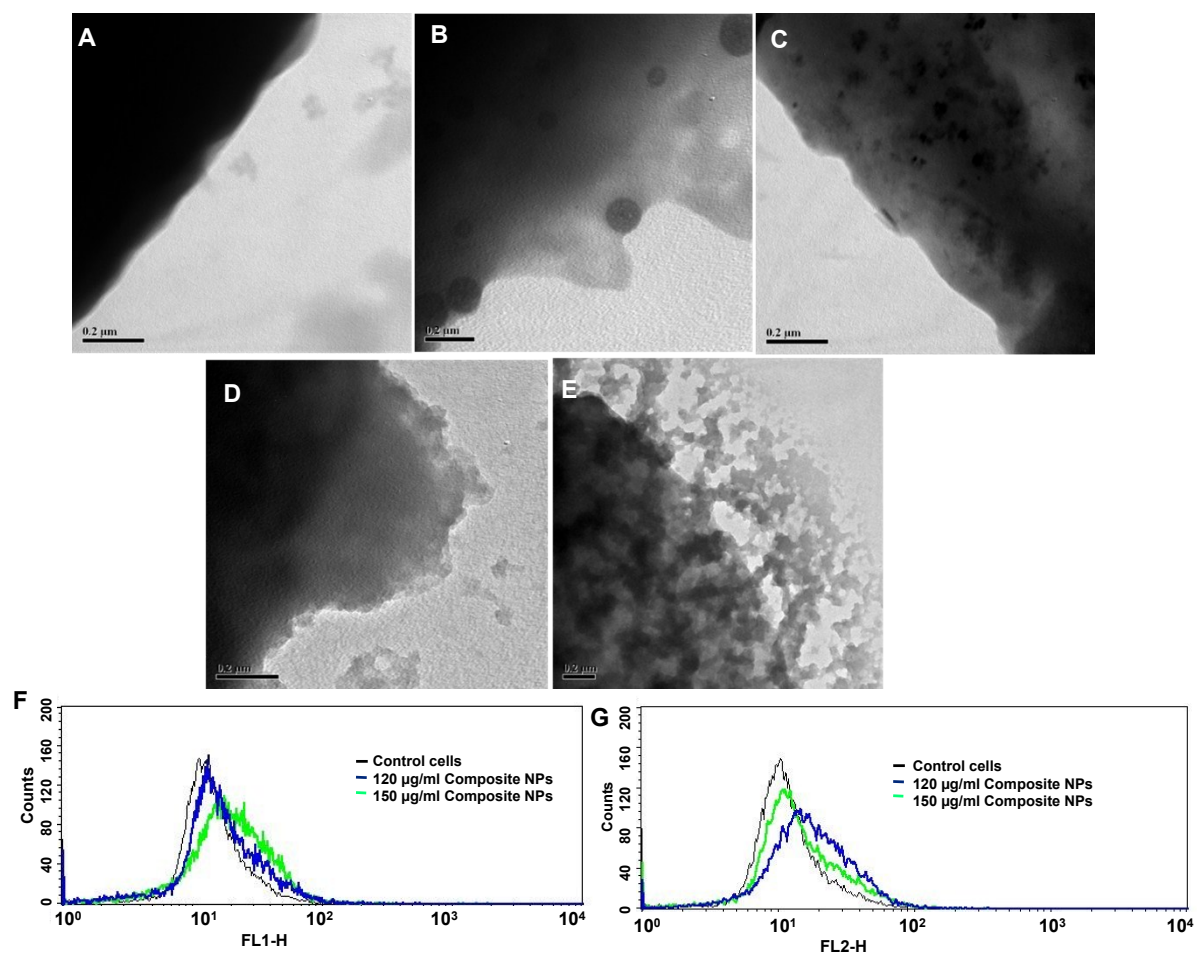

**Figure S10.** (A-E) Time dependent TEM analysis of HeLa cells treated with  $\text{IC}_{50}$  dose of composite NPs for 1 h, 3 h, 6 h, 12 h, 24 h, respectively, at 0.2  $\mu\text{m}$  scale. Extensions of plasma membrane at 3 h suggests endocytosis mediated uptake of composite NPs; membrane disruption at 24 h is visible. (F,G) FACS analysis of uptake of composite NPs in FL1-H and FL2-H, respectively.

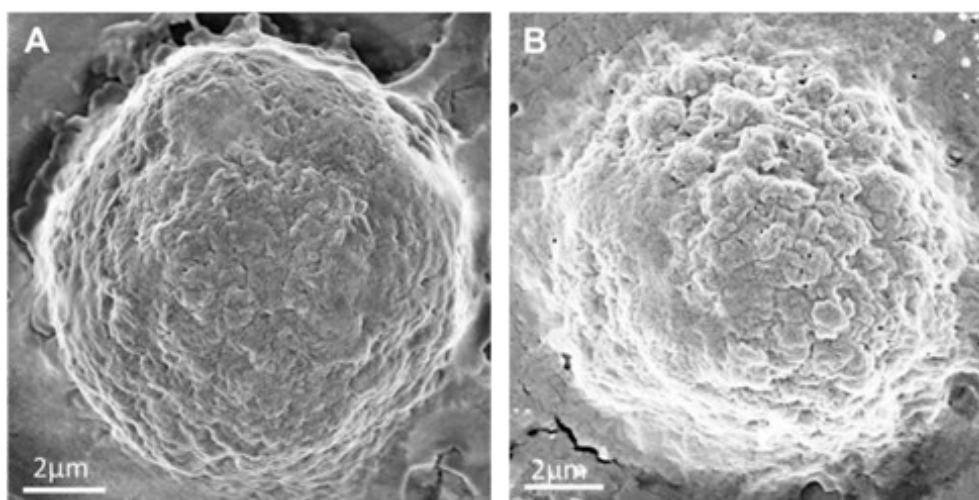

**Figure S11:** (A-B) FESEM images of control and composite NP<sub>Δ</sub> treated HeLa cells. Scale bar is 2 μm .

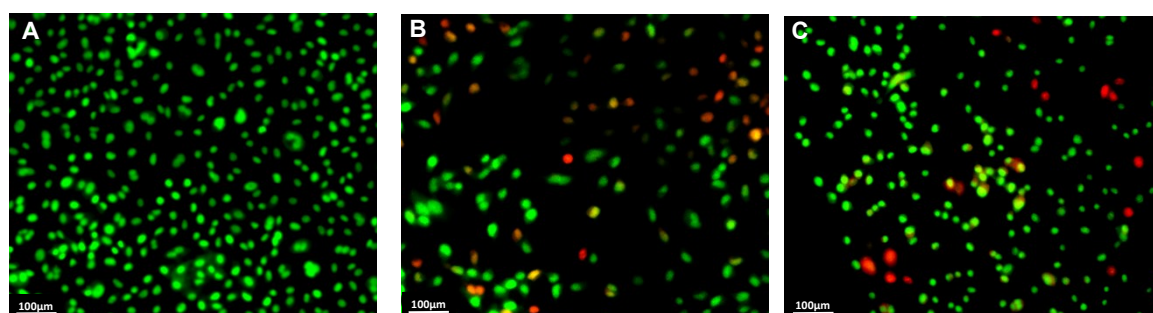

**Figure S12.** (A) EtBr/AO double staining of control HeLa cells, (B) composite NP<sub>Δ</sub> treated (for 24 h at IC<sub>5</sub>) HeLa cells, (C) AgNP<sub>Δ</sub> only treated HeLa cells for 24 hrs at IC<sub>50</sub>.

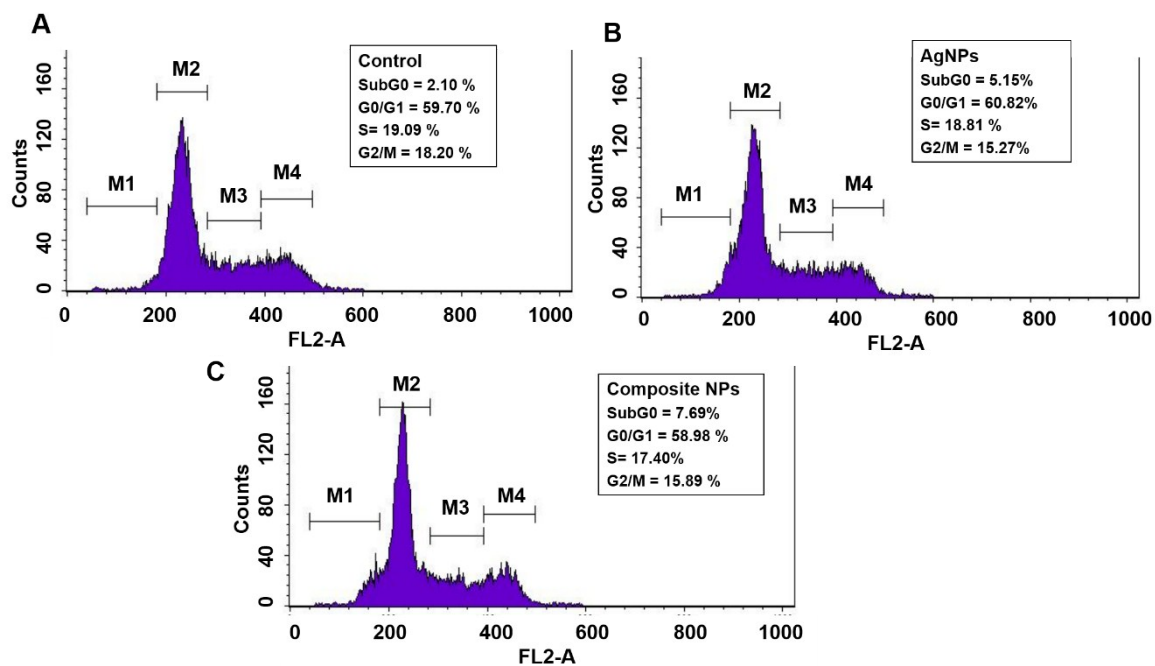

**Figure S13.** (A-C) Cell cycle analysis of control HeLa cells, AgNP<sub>A</sub> treated HeLa Cells, composite NPs treated HeLa cells, respectively, for 24 h at IC<sub>50</sub>.

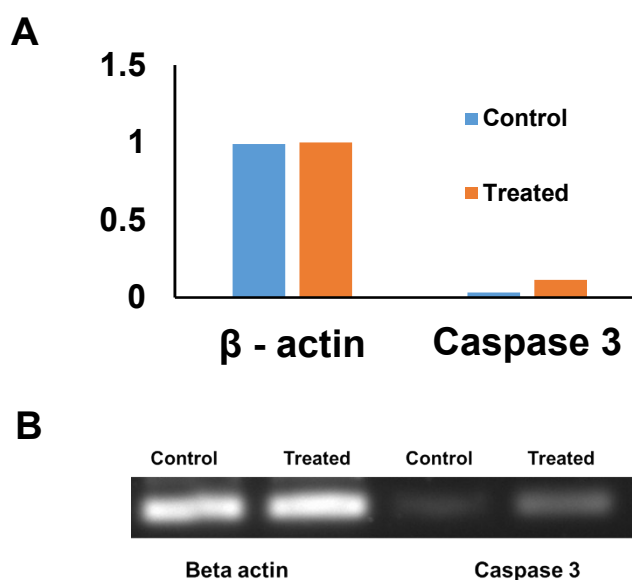

**Figure S14.** (A-B) Overexpression of Caspase 3 was observed from gene expression analysis of composite NP<sub>A</sub> treated and control cells, taking  $\beta$ -actin as endogenous control.
